# Supplementary material for: Very large treatment effects in randomised trials as an empirical marker to indicate whether subsequent trials are necessary: meta-epidemiological assessment
Source: PubMed Central journal article supplement — BMJ. 2016 Oct 27;355:i5432. doi: 10.1136/bmj.i5432 (PMC5081692; doi:10.1136/bmj.i5432), 2016-10-27
Supplement: nagm034309.ww_default.pdf [file nagm034309.ww_default.pdf]

**Very large treatment effects in randomised trials as an empirical marker to indicate whether subsequent trials are necessary: meta-epidemiological assessment**

**Appendix: ONLINE SUPPLEMENTAL DATA**

Myura Nagendran, MA, MRCP<sup>1</sup>

Tiago V Pereira, PhD<sup>2</sup>

Grace Kiew, BA<sup>3</sup>

Douglas G Altman, DSc<sup>4</sup>

Mahiben Maruthappu, MA, BM BCh<sup>5</sup>

John P A Ioannidis, MD, DSc<sup>6</sup>

Peter McCulloch, MD, FRCSEd<sup>7</sup>

1. Division of Anaesthetics, Pain Medicine and Intensive Care, Imperial College London, UK
2. Health Technology Assessment Unit, Institute of Education and Sciences, Hospital Alemão Oswaldo Cruz, Sao Paulo, Brazil
3. Gonville and Caius College, University of Cambridge, UK
4. Centre for Statistics in Medicine, Oxford, UK
5. North West Thames Foundation School, London, UK
6. Departments of Medicine, of Health Research and Policy, and of Statistics, and Meta-Research Innovation Center at Stanford (METRICS), Stanford University, USA
7. Nuffield Department of Surgical Science, University of Oxford, UK

## TABLE LEGENDS

### **Table S1. Intervention and comparator information for upheld index trial VLEs.**

Abbreviations: ARD, absolute risk difference; CDSR ID, Cochrane database of systematic reviews identification; CI, confidence interval; RR, relative risk; VLE, very large effect.

### **Table S2. Intervention and comparator information for refuted index trial VLEs.**

Abbreviations: ARD, absolute risk difference; CDSR ID, Cochrane database of systematic reviews identification; CI, confidence interval; RR, relative risk; VLE, very large effect.

**Table S3. Number of large trials refuting index trial VLEs.** Abbreviations: CDSR ID, Cochrane database of systematic reviews identification

## NOTE REGARDING REFERENCES

References have been included in the supplement for the Cochrane reviews from which all index trials and subsequent large trials originate.

Individual references for index and large trials have not been listed here. When extracting data for analysis, Cochrane reviewers use every available source (published full text original article, published subsequent full-text analysis, published abstract, unpublished data).

In many cases, there are several sources for a single trial. Hence, it is best to locate the sources directly from the reference list of the Cochrane review and we have not duplicated this work here.

**Table S1. Intervention and comparator information for upheld index trial VLEs.**

| Cochrane review information |                                                                                               |                                                                 |                                                                    | Index trial |            |      |              | Large trial data |           |      |              | Reference |
|-----------------------------|-----------------------------------------------------------------------------------------------|-----------------------------------------------------------------|--------------------------------------------------------------------|-------------|------------|------|--------------|------------------|-----------|------|--------------|-----------|
| CDSR ID                     | Population                                                                                    | Intervention                                                    | Outcome                                                            | RR          | 95% CI     | ARD  | 95% CI       | RR               | 95% CI    | ARD  | 95% CI       |           |
| CD004181                    | Patients at the stage of pre- exposure or post-exposure of hepatitis A (infectious hepatitis) | No intervention, placebo or control vs. immunoglobulins         | Number with hepatitis A or infectious hepatitis at 6-12 months     | 5.03        | 3.18-7.94  | 0.01 | 0.00 to 0.01 | 1.94             | 1.74-2.17 | 0.00 | 0.00 to 0.01 | 1         |
| CD004736                    | Pregnant women                                                                                | Daily iron vs. placebo/no intervention                          | Haemoconcentration (i.e. Hb rise) during second or third trimester | 5.08        | 1.87-14.64 | 0.15 | 0.07 to 0.24 | 5.66             | 4.26-7.52 | 0.57 | 0.52 to 0.63 | 2         |
| CD001290                    | Asthmatic children at risk of asthma-related emergency department attendance                  | Control vs. education (any type)                                | Emergency Department visits                                        | 5.17        | 2.35-11.76 | 0.31 | 0.19 to 0.43 | 1.37             | 1.12-1.68 | 0.15 | 0.06 to 0.24 | 3         |
| CD006936                    | Adult smokers                                                                                 | Motivational interviewing vs. brief advice/usual care           | Abstinence at maximal follow up                                    | 5.28        | 1.75-17.92 | 0.15 | 0.07 to 0.23 | 1.21             | 1.05-1.39 | 0.03 | 0.01 to 0.05 | 4         |
| CD001886                    | Adults requiring surgery                                                                      | Control vs. aprotinin (anti-fibrinolytic)                       | No. exposed to allogeneic blood                                    | 5.33        | 1.10-90.83 | 0.54 | 0.16 to 0.93 | 1.47             | 1.31-1.66 | 0.17 | 0.12 to 0.23 | 5         |
| CD004386                    | Patients with cancer and neutropenia                                                          | Intervention vs. quinolone antibiotic                           | Febrile episodes                                                   | 5.33        | 2.04-17.49 | 0.62 | 0.38 to 0.85 | 1.39             | 1.11-1.74 | 0.05 | 0.02 to 0.09 | 6         |
| CD007277                    | Adults with rheumatoid arthritis                                                              | Abatacept vs. placebo                                           | ACR 50% improvement                                                | 5.40        | 2.32-14.04 | 0.17 | 0.11 to 0.22 | 2.37             | 1.72-3.26 | 0.23 | 0.16 to 0.30 | 7         |
| CD006063                    | Adults with type 2 diabetes mellitus                                                          | Rosiglitazone vs. control                                       | Oedema                                                             | 5.61        | 1.79-18.36 | 0.09 | 0.04 to 0.14 | 1.65             | 1.34-2.04 | 0.06 | 0.03 to 0.08 | 8         |
| CD003756                    | Children living in malaria endemic regions                                                    | Placebo vs. intermittent preventive treatment with antimalarial | Clinical malaria                                                   | 5.64        | 4.10-7.76  | 0.34 | 0.29 to 0.39 | 1.13             | 1.01-1.26 | 0.07 | 0.01 to 0.13 | 9         |

|          |                                                                           |                                                          |                                                     |       |             |      |              |      |            |      |              |    |
|----------|---------------------------------------------------------------------------|----------------------------------------------------------|-----------------------------------------------------|-------|-------------|------|--------------|------|------------|------|--------------|----|
| CD000022 | Adults receiving intensive care                                           | No prophylaxis vs. topical plus systemic antibiotic      | Respiratory tract infections                        | 6.46  | 2.86-15.87  | 0.56 | 0.40 to 0.72 | 1.66 | 1.36-2.02  | 0.23 | 0.14 to 0.31 | 10 |
| CD003611 | Adults undergoing heart surgery                                           | Control vs. all treatments                               | Post operative atrial fibrillation                  | 7.32  | 2.08-35.41  | 0.34 | 0.19 to 0.50 | 1.25 | 1.05-1.48  | 0.08 | 0.02 to 0.14 | 11 |
| CD003221 | Adults with migraine pain of moderate to severe intensity                 | Rizatriptan vs. placebo                                  | Pain-free response at 2 hours                       | 7.32  | 2.45-25.79  | 0.22 | 0.12-0.32    | 4.23 | 2.96-6.03  | 0.32 | 0.26 to 0.38 | 12 |
| CD000262 | Adult pregnant women                                                      | Placebo/control vs. any antibiotic                       | Failure of test of cure of bacterial vaginosis      | 7.58  | 3.47-18.72  | 0.75 | 0.60 to 0.89 | 2.87 | 2.54-3.24  | 0.37 | 0.34 to 0.41 | 13 |
| CD001478 | Children at risk of whooping cough                                        | Whole cell vaccine vs. acellular vaccine                 | Primary series non-completion due to adverse events | 7.59  | 1.63-42.27  | 0.05 | 0.00 to 0.11 | 1.82 | 1.43-2.33  | 0.00 | 0.00 to 0.00 | 14 |
| CD006743 | Patients with acute cardiovascular event                                  | Control vs. nitrates                                     | All-cause mortality at 2 days                       | 7.90  | 1.27-99.80  | 0.04 | 0.01 to 0.08 | 1.22 | 1.11-1.35  | 0.00 | 0.00 to 0.01 | 15 |
| CD000146 | Adult smokers                                                             | Nicotine replacement therapy (patch) vs. placebo/control | Smoking cessation at >6 months follow up            | 8.21  | 2.18-39.39  | 0.18 | 0.08 to 0.28 | 1.54 | 1.34-1.77  | 0.07 | 0.05 to 0.09 | 16 |
| CD003897 | Kidney transplant recipients                                              | Placebo or no treatment vs. IL2Ra                        | Biopsy-proven acute rejection at 1 year             | 8.80  | 1.17-∞      | 0.36 | 0.09 to 0.63 | 1.43 | 1.14-1.79  | 0.08 | 0.03 to 0.13 | 17 |
| CD008521 | Children                                                                  | Placebo vs. rotarix (RV1) vaccine                        | Rotavirus diarrhoea of any severity up to 1 year    | 9.08  | 2.41-42.30  | 0.15 | 0.07 to 0.23 | 2.15 | 1.75-2.63  | 0.06 | 0.05 to 0.08 | 18 |
| CD004352 | Pregnant women in spontaneous preterm labour                              | Placebo vs. all betamimetics                             | Birth within 48 hours of treatment                  | 10.00 | 1.99-183.52 | 0.60 | 0.33 to 0.87 | 1.66 | 1.30-2.12  | 0.14 | 0.08 to 0.21 | 19 |
| CD001841 | Adults requiring first line anti-hypertensive treatment                   | Placebo vs. high dose thiazide                           | Total cardiovascular events                         | 11.47 | 1.97-204.42 | 0.14 | 0.05 to 0.23 | 1.25 | 1.03-1.51  | 0.01 | 0.00 to 0.01 | 20 |
| CD004125 | Patients undergoing general anaesthesia, regional anaesthesia or sedation | Placebo vs. ondansetron                                  | Nausea                                              | 13.00 | 2.57-224.97 | 0.60 | 0.37 to 0.83 | 1.24 | 1.02-1.52  | 0.10 | 0.01 to 0.19 | 21 |
| CD004604 | Adults with moderate to severe postoperative pain                         | Rofecoxib vs. placebo                                    | >50% pain relief over 4 to 6 hours                  | 23.00 | 4.42-393.80 | 0.69 | 0.52 to 0.85 | 8.40 | 5.48-12.87 | 0.55 | 0.50 to 0.61 | 22 |

|          |                                                                    |                            |                            |       |            |      |              |       |             |      |              |    |
|----------|--------------------------------------------------------------------|----------------------------|----------------------------|-------|------------|------|--------------|-------|-------------|------|--------------|----|
| CD007223 | Women being treated for spontaneous miscarriage                    | Surgery vs. misoprostol    | Surgical evacuation        | 24.79 | 9.79-67.48 | 0.89 | 0.82 to 0.96 | 18.00 | 10.39-31.21 | 0.94 | 0.90 to 0.97 | 23 |
| CD006060 | Adults with type 2 diabetes mellitus                               | Pioglitazone vs. control   | Oedema                     | 30.98 | 3.93-∞     | 0.04 | 0.02 to 0.06 | 1.67  | 1.47-1.88   | 0.09 | 0.07 to 0.11 | 24 |
| CD003775 | Patients with chronic renal failure who are seronegative for HBsAg | Plasma vaccine vs. placebo | Seroconversion to anti-HBs | 48.64 | 6.47-∞     | 0.36 | 0.25 to 0.47 | 21.43 | 11.83-38.84 | 0.35 | 0.31 to 0.38 | 25 |

**Table S2. Intervention and comparator information for refuted index trial VLEs.**

| Cochrane review information |                                                           |                                   |                                       | Index trial |             |      |              | Large trial data |           |      |               | Reference |
|-----------------------------|-----------------------------------------------------------|-----------------------------------|---------------------------------------|-------------|-------------|------|--------------|------------------|-----------|------|---------------|-----------|
| CDSR ID                     | Population                                                | Intervention                      | Outcome                               | RR          | 95% CI      | ARD  | 95% CI       | RR               | 95% CI    | ARD  | 95% CI        |           |
| CD001960                    | Adults with dyspepsia symptoms                            | Placebo vs. prokinetic            | Global symptom assessment             | 5.21        | 2.55-11.83  | 0.57 | 0.41 to 0.74 | 1.04             | 0.92-1.18 | 0.02 | -0.04 to 0.07 | 26        |
| CD001090                    | Patients with sepsis or septic shock                      | Placebo vs. IVIg                  | Mortality                             | 5.34        | 1.41-26.16  | 0.26 | 0.08 to 0.43 | 1.05             | 0.86-1.29 | 0.02 | -0.06 to 0.10 | 27        |
| CD007176                    | Adult                                                     | Placebo vs. antioxidant           | Mortality                             | 5.44        | 1.38-21.96  | 0.03 | 0.00 to 0.06 | 1.05             | 1.03-1.08 | 0.01 | 0.00 to 0.01  | 28        |
| CD004183                    | Adults at high risk of developing gastrointestinal cancer | Placebo vs. antioxidant           | Gastrointestinal cancers at follow-up | 5.46        | 1.18-30.09  | 0.08 | 0.01 to 0.16 | 1.09             | 0.95-1.25 | 0.00 | -0.00 to 0.00 | 29        |
| CD001928                    | Patients with presumed or definite acute ischemic stroke  | Control vs. calcium antagonists   | Poor outcome at end of follow up      | 5.61        | 1.56-25.19  | 0.32 | 0.12 to 0.51 | 1.01             | 0.94-1.09 | 0.01 | -0.03 to 0.04 | 30        |
| CD001090                    | Patients with sepsis or septic shock                      | Placebo vs. IVIg                  | Mortality                             | 6.63        | 1.26-91.41  | 0.40 | 0.14 to 0.66 | 1.04             | 0.96-1.13 | 0.02 | -0.02 to 0.05 | 27        |
| CD001188                    | Adult smokers                                             | Nursing interventions vs. control | Smoking cessation                     | 7.54        | 2.48-24.62  | 0.15 | 0.08 to 0.21 | 1.12             | 0.90-1.41 | 0.03 | -0.03 to 0.10 | 31        |
| CD001150                    | Preterm infants                                           | Control vs. topical ointment      | Any bacterial infection               | 8.00        | 1.37-103.53 | 0.23 | 0.06 to 0.40 | 1.26             | 1.02-1.56 | 0.05 | 0.01 to 0.10  | 32        |
| CD003180                    | Adults                                                    | Intervention vs. usual care       | Self-reported physical activity       | 8.00        | 1.60-125.80 | 0.26 | 0.15 to 0.37 | 1.03             | 0.91-1.15 | 0.01 | -0.04 to 0.06 | 33        |
| CD002755                    | Patients with suspected or proven myocardial infarction   | Placebo vs. magnesium             | Mortality                             | 8.49        | 1.43-139.72 | 0.15 | 0.04 to 0.26 | 1.01             | 0.97-1.07 | 0.00 | -0.00 to 0.01 | 34        |
| CD001141                    | Women intending to breastfeed their babies                | Usual care vs. support            | Cessation of breastfeeding            | 8.64        | 1.51-136.30 | 0.28 | 0.09 to 0.48 | 1.07             | 1.02-1.13 | 0.04 | 0.01 to 0.06  | 35        |
| CD004227                    | Pregnant women at risk of developing pre-eclampsia        | Placebo vs. antioxidant           | Pre-eclampsia                         | 9.73        | 1.08-∞      | 0.08 | 0.00 to 0.17 | 1.03             | 0.85-1.24 | 0.00 | -0.02 to 0.03 | 36        |

|          |                                                            |                                              |                                  |       |        |      |              |      |           |      |               |    |
|----------|------------------------------------------------------------|----------------------------------------------|----------------------------------|-------|--------|------|--------------|------|-----------|------|---------------|----|
| CD001058 | Women with preterm membrane rupture                        | Antibiotics vs. placebo                      | Perinatal death                  | 12.55 | 1.58-∞ | 0.21 | 0.05 to 0.37 | 1.06 | 0.83-1.36 | 0.00 | -0.02 to 0.01 | 37 |
| CD003246 | Pregnant women due for third trimester induction of labour | Oxytocin vs. placebo or expectant management | Caesarean section                | 13.00 | 1.66-∞ | 0.30 | 0.09 to 0.51 | 1.04 | 0.82-1.31 | 0.00 | -0.02 to 0.03 | 38 |
| CD002138 | Adults undergoing coronary artery bypass grafting          | Normothermia vs. hypothermia                 | Composite poor outcome           | 13.00 | 1.67-∞ | 0.27 | 0.08 to 0.47 | 1.08 | 0.94-1.24 | 0.02 | -0.05 to 0.01 | 39 |
| CD004659 | Pregnant women at risk of developing pre-eclampsia         | Placebo vs. antiplatelet                     | Proteinuric pre-eclampsia        | 13.85 | 1.70-∞ | 0.13 | 0.03 to 0.24 | 1.12 | 0.99-1.26 | 0.01 | -0.00 to 0.02 | 40 |
| CD000567 | Critically ill patients                                    | Colloids vs. crystalloids                    | Mortality                        | 15.00 | 1.92-∞ | 0.26 | 0.09 to 0.43 | 1.00 | 0.92-1.09 | 0.00 | -0.02 to 0.02 | 41 |
| CD001287 | Adults with chronic bronchitis                             | Mucolytic vs. placebo                        | No exacerbations in study period | 16.23 | 2.14-∞ | 0.38 | 0.17 to 0.59 | 1.06 | 0.93-1.21 | 0.02 | -0.02 to 0.06 | 42 |
| CD005445 | Adults with chronic hepatitis C                            | Ribavirin + interferon vs. interferon        | Adverse events                   | 17.00 | 2.17-∞ | 0.25 | 0.10 to 0.40 | 1.03 | 0.73-1.45 | 0.00 | -0.04 to 0.04 | 43 |

**Table S3. Number of large trials refuting index trial VLE.**

| <b>CDSR ID</b> | <b>Index trial VLE refuted</b> | <b>No. of large trials</b> | <b>No. of large trials refuting index trial VLE</b> |
|----------------|--------------------------------|----------------------------|-----------------------------------------------------|
| CD000022       | No                             | 1                          | 0                                                   |
| CD000146       | No                             | 3                          | 0                                                   |
| CD000262       | No                             | 2                          | 0                                                   |
| CD000567       | Yes                            | 2                          | 2                                                   |
| CD001058       | Yes                            | 1                          | 1                                                   |
| CD001090       | Yes                            | 3                          | 3                                                   |
| CD001090       | Yes                            | 1                          | 1                                                   |
| CD001141       | Yes                            | 7                          | 4                                                   |
| CD001150       | Yes                            | 1                          | 1                                                   |
| CD001188       | Yes                            | 1                          | 1                                                   |
| CD001287       | Yes                            | 2                          | 2                                                   |
| CD001290       | No                             | 1                          | 0                                                   |
| CD001478       | No                             | 1                          | 0                                                   |
| CD001841       | No                             | 1                          | 0                                                   |
| CD001886       | No                             | 2                          | 0                                                   |
| CD001928       | Yes                            | 3                          | 3                                                   |
| CD001960       | Yes                            | 3                          | 2                                                   |
| CD002138       | Yes                            | 2                          | 2                                                   |
| CD002755       | Yes                            | 4                          | 2                                                   |
| CD003180       | Yes                            | 2                          | 2                                                   |
| CD003221       | No                             | 1                          | 0                                                   |
| CD003246       | Yes                            | 1                          | 1                                                   |
| CD003611       | No                             | 1                          | 0                                                   |
| CD003756       | No                             | 1                          | 0                                                   |
| CD003775       | No                             | 1                          | 0                                                   |
| CD003897       | No                             | 1                          | 0                                                   |
| CD004125       | No                             | 1                          | 0                                                   |
| CD004181       | No                             | 2                          | 0                                                   |
| CD004183       | Yes                            | 2                          | 2                                                   |
| CD004227       | Yes                            | 1                          | 1                                                   |
| CD004352       | No                             | 1                          | 0                                                   |
| CD004386       | No                             | 1                          | 0                                                   |
| CD004604       | No                             | 1                          | 0                                                   |
| CD004659       | Yes                            | 3                          | 2                                                   |
| CD004736       | No                             | 1                          | 0                                                   |
| CD005445       | Yes                            | 1                          | 1                                                   |
| CD006060       | No                             | 1                          | 0                                                   |
| CD006063       | No                             | 1                          | 0                                                   |
| CD006743       | No                             | 2                          | 0                                                   |
| CD006936       | No                             | 1                          | 0                                                   |
| CD007176       | Yes                            | 9                          | 9                                                   |
| CD007223       | No                             | 1                          | 0                                                   |
| CD007277       | No                             | 1                          | 0                                                   |
| CD008521       | No                             | 1                          | 0                                                   |



## REFERENCES

1. Liu JP, Nikolova D, Fei Y. Immunoglobulins for preventing hepatitis A. *Cochrane Database Syst Rev* 2009; (2): CD004181.
2. Pena-Rosas JP, De-Regil LM, Garcia-Casal MN, Dowswell T. Daily oral iron supplementation during pregnancy. *Cochrane Database Syst Rev* 2015; (7): CD004736.
3. Boyd M, Lasserson TJ, McKean MC, Gibson PG, Ducharme FM, Haby M. Interventions for educating children who are at risk of asthma-related emergency department attendance. *Cochrane Database Syst Rev* 2009; (2): CD001290.
4. Lindson-Hawley N, Thompson TP, Begh R. Motivational interviewing for smoking cessation. *Cochrane Database Syst Rev* 2015; (3): CD006936.
5. Henry DA, Carless PA, Moxey AJ, et al. Anti-fibrinolytic use for minimising perioperative allogeneic blood transfusion. *Cochrane Database Syst Rev* 2011; (3): CD001886.
6. Gafter-Gvili A, Fraser A, Paul M, et al. Antibiotic prophylaxis for bacterial infections in afebrile neutropenic patients following chemotherapy. *Cochrane Database Syst Rev* 2012; 1: CD004386.
7. Maxwell L, Singh JA. Abatacept for rheumatoid arthritis. *Cochrane Database Syst Rev* 2009; (4): CD007277.
8. Richter B, Bandeira-Echtler E, Bergerhoff K, Clar C, Ebrahim SH. Rosiglitazone for type 2 diabetes mellitus. *Cochrane Database Syst Rev* 2007; (3): CD006063.
9. Meremikwu MM, Donegan S, Sinclair D, Esu E, Oringanje C. Intermittent preventive treatment for malaria in children living in areas with seasonal transmission. *Cochrane Database Syst Rev* 2012; (2): CD003756.
10. Liberati A, D'Amico R, Pifferi S, Torri V, Brazzi L, Parmelli E. Antibiotic prophylaxis to reduce respiratory tract infections and mortality in adults receiving intensive care. *Cochrane Database Syst Rev* 2009; (4): CD000022.
11. Arsenault KA, Yusuf AM, Crystal E, et al. Interventions for preventing post-operative atrial fibrillation in patients undergoing heart surgery. *Cochrane Database Syst Rev* 2013; (1): CD003611.
12. Oldman AD, Smith LA, McQuay HJ, Moore RA. Rizatriptan for acute migraine. *Cochrane Database Syst Rev* 2001; (3): CD003221.
13. Brocklehurst P, Gordon A, Heatley E, Milan SJ. Antibiotics for treating bacterial vaginosis in pregnancy. *Cochrane Database Syst Rev* 2013; (1): CD000262.
14. Zhang L, Prietsch SO, Axelsson I, Halperin SA. Acellular vaccines for preventing whooping cough in children. *Cochrane Database Syst Rev* 2014; (9): CD001478.

15. Perez MI, Musini VM, Wright JM. Effect of early treatment with anti-hypertensive drugs on short and long-term mortality in patients with an acute cardiovascular event. *Cochrane Database Syst Rev* 2009; (4): CD006743.
16. Stead LF, Perera R, Bullen C, et al. Nicotine replacement therapy for smoking cessation. *Cochrane Database Syst Rev* 2012; **11**: CD000146.
17. Webster AC, Ruster LP, McGee R, et al. Interleukin 2 receptor antagonists for kidney transplant recipients. *Cochrane Database Syst Rev* 2010; (1): CD003897.
18. Soares-Weiser K, Macle hose H, Bergman H, et al. Vaccines for preventing rotavirus diarrhoea: vaccines in use. *Cochrane Database Syst Rev* 2012; **11**: CD008521.
19. Neilson JP, West HM, Dowswell T. Betamimetics for inhibiting preterm labour. *Cochrane Database Syst Rev* 2014; (2): CD004352.
20. Wright JM, Musini VM. First-line drugs for hypertension. *Cochrane Database Syst Rev* 2009; (3): CD001841.
21. Carlisle JB, Stevenson CA. Drugs for preventing postoperative nausea and vomiting. *Cochrane Database Syst Rev* 2006; (3): CD004125.
22. Bulley S, Derry S, Moore RA, McQuay HJ. Single dose oral rofecoxib for acute postoperative pain in adults. *Cochrane Database Syst Rev* 2009; (4): CD004604.
23. Neilson JP, Gyte GM, Hickey M, Vazquez JC, Dou L. Medical treatments for incomplete miscarriage. *Cochrane Database Syst Rev* 2013; (3): CD007223.
24. Richter B, Bandeira-Echtler E, Bergerhoff K, Clar C, Ebrahim SH. Pioglitazone for type 2 diabetes mellitus. *Cochrane Database Syst Rev* 2006; (4): CD006060.
25. Schroth RJ, Hitchon CA, Uhanova J, et al. Hepatitis B vaccination for patients with chronic renal failure. *Cochrane Database Syst Rev* 2004; (3): CD003775.
26. Moayyedi P, Soo S, Deeks J, Delaney B, Innes M, Forman D. Pharmacological interventions for non-ulcer dyspepsia. *Cochrane Database Syst Rev* 2006; (4): CD001960.
27. Alejandria MM, Lansang MA, Dans LF, Mantaring JB, 3rd. Intravenous immunoglobulin for treating sepsis, severe sepsis and septic shock. *Cochrane Database Syst Rev* 2013; (9): CD001090.
28. Bjelakovic G, Nikolova D, Gluud LL, Simonetti RG, Gluud C. Antioxidant supplements for prevention of mortality in healthy participants and patients with various diseases. *Cochrane Database Syst Rev* 2012; (3): CD007176.
29. Bjelakovic G, Nikolova D, Simonetti RG, Gluud C. Antioxidant supplements for preventing gastrointestinal cancers. *Cochrane Database Syst Rev* 2008; (3): CD004183.
30. Zhang J, Yang J, Zhang C, Jiang X, Zhou H, Liu M. Calcium antagonists for acute ischemic stroke. *Cochrane Database Syst Rev* 2012; (5): CD001928.

31. Rice VH, Hartmann-Boyce J, Stead LF. Nursing interventions for smoking cessation. *Cochrane Database Syst Rev* 2013; (8): CD001188.
32. Conner JM, Soll RF, Edwards WH. Topical ointment for preventing infection in preterm infants. *Cochrane Database Syst Rev* 2004; (1): CD001150.
33. Hillsdon M, Foster C, Thorogood M. Interventions for promoting physical activity. *Cochrane Database Syst Rev* 2005; (1): CD003180.
34. Li J, Zhang Q, Zhang M, Egger M. Intravenous magnesium for acute myocardial infarction. *Cochrane Database Syst Rev* 2007; (2): CD002755.
35. Renfrew MJ, McCormick FM, Wade A, Quinn B, Dowswell T. Support for healthy breastfeeding mothers with healthy term babies. *Cochrane Database Syst Rev* 2012; (5): CD001141.
36. Rumbold A, Duley L, Crowther CA, Haslam RR. Antioxidants for preventing pre-eclampsia. *Cochrane Database Syst Rev* 2008; (1): CD004227.
37. Kenyon S, Boulvain M, Neilson JP. Antibiotics for preterm rupture of membranes. *Cochrane Database Syst Rev* 2013; (12): CD001058.
38. Alfirevic Z, Kelly AJ, Dowswell T. Intravenous oxytocin alone for cervical ripening and induction of labour. *Cochrane Database Syst Rev* 2009; (4): CD003246.
39. Rees K, Beranek-Stanley M, Burke M, Ebrahim S. Hypothermia to reduce neurological damage following coronary artery bypass surgery. *Cochrane Database Syst Rev* 2001; (1): CD002138.
40. Duley L, Henderson-Smart DJ, Meher S, King JF. Antiplatelet agents for preventing pre-eclampsia and its complications. *Cochrane Database Syst Rev* 2007; (2): CD004659.
41. Perel P, Roberts I, Ker K. Colloids versus crystalloids for fluid resuscitation in critically ill patients. *Cochrane Database Syst Rev* 2013; (2): CD000567.
42. Poole P, Chong J, Cates CJ. Mucolytic agents versus placebo for chronic bronchitis or chronic obstructive pulmonary disease. *Cochrane Database Syst Rev* 2015; (7): CD001287.
43. Brok J, Gluud LL, Gluud C. Ribavirin plus interferon versus interferon for chronic hepatitis C. *Cochrane Database Syst Rev* 2010; (1): CD005445.
